# Supplementary material for: A novel CoP/MoS2-CNTs hybrid catalyst with Pt-like activity for hydrogen evolution
Source: Royal Society of Chemistry journal article supplement (doi:10.1039/c5cy02299a), 2016-01-01
Supplement: c5cy02299a1.pdf [file c5cy02299a1.pdf]

**Supporting Information for**  
**A novel CoP/MoS<sub>2</sub>-CNTs hybrid catalyst with Pt-like activity for**  
**hydrogen evolution**

Yuan Pan, Yan Lin, Yunqi Liu\*, Chenguang Liu\*

*State Key Laboratory of Heavy Oil Processing, China University of Petroleum, 66 West Changjiang Road,*

*Qingdao, Shandong 266580, P. R. China*

**Experimental**

---

\* Corresponding author. E-mail address: [liuyq@upc.edu.cn](mailto:liuyq@upc.edu.cn); [cgliu1962@sina.com](mailto:cgliu1962@sina.com)

Tel.: +86-532-86981861; +86-532-86981716.

## *Materials*

Molybdenum sulfide ( $\text{MoS}_2$ , 99.5%), cobalt(II) acetylacetonate ( $\text{Co}(\text{acac})_2$ , 97%), trioctylphosphine (TOP, 90%), oleylamine (OAm, 95%), carbon nanotubes (CNTs, 95%, inside diameter: 3-5 nm, outside diameter: 8-15 nm, length: 50  $\mu\text{m}$ ), ethanol ( $\geq 99.7\%$ ), hexane ( $\geq 99.5\%$ ), Nafion solution (5% in a mixture of lower aliphatic alcohols and water) and 20% Pt/C catalyst were purchased from Aladdin Chemistry Co. Ltd.

## *Synthesis of CoP/MoS<sub>2</sub>-CNTs hybrid catalyst*

In a typical synthesis,  $\text{Co}(\text{acac})_2$  (0.257 g, 1 mmol),  $\text{MoS}_2$  (50 mg, 0.312 mmol), CNTs (40mg), ODE (5 mL, 15.6 mmol) and OAm (10 mL, 30.4 mmol) were placed in a four-neck flask under a flow of argon. The mixture was stirred and heated to 120 °C. Then TOP (5 mL, 11 mmol) was added to the above mixture solution and heated to 330 °C and kept at this temperature for 1 h. The product was washed with a mixture solvent of hexane and ethanol ( $V_{\text{hexane}}: V_{\text{ethanol}} = 1 : 3$ ) by centrifugation after cooling to room temperature. Finally, CoP/MoS<sub>2</sub>-CNTs hybrid catalyst can be synthesized by drying in vacuum at 60 °C for 24 h. Without changing other reaction conditions, no CNTs were added into the above reaction system before heating, the product was CoP/MoS<sub>2</sub> hybrid catalyst. In addition, pure CoP nanorods can be obtained in the above system without the addition of CNTs and MoS<sub>2</sub>.

## *Characterization*

X-ray diffraction (XRD) was measured on a panalytical X'pert PRO X-ray diffractometer with Cu  $K\alpha$  monochromatized radiation ( $\lambda = 1.54 \text{ \AA}$ ) and operated at 45 kV and 40 mA. Scanning electron microscope (SEM) were carried out in Hitachi S-4800 at 5 kV. Transmission electron microscopy (TEM) and energy dispersive X-Ray spectroscopy (EDX) were carried out on a Tecnai-G20

microscope (FEI, USA) at an accelerating voltage of 200 kV. X-ray photoelectron spectroscopy (XPS) was operated on a VG ESCALABMK II spectrometer with a monochromatic Al K $\alpha$  source. N<sub>2</sub> sorption experiments were performed on a ChemBET 3000 (Quantachrome, USA) instrument.

#### *Electrochemical measurements*

The electrochemical measurements of the samples were performed in nitrogen-purged 0.5 M H<sub>2</sub>SO<sub>4</sub> using a Gamry Instruments Reference 600 potentiostat in a standard three-electrode cell at room temperature. Ag/AgCl electrode as the reference electrode, a Pt wire as the counter electrode and the glassy carbon electrode (GCE) modifying samples as the working electrode. The preparation of working electrode was described as follows. 5 mg of sample catalyst was added into 1 mL of ethanol containing 20  $\mu$ L of 5 wt% Nafion, the mixture was dispersed by sonicating for 30 min to form a homogeneous ink. Then 5  $\mu$ L catalyst ink was loaded onto a GCE surface. All the potentials were referenced to reversible hydrogen electrode (RHE) using the following equation:  $E \text{ (V vs. RHE)} = E \text{ (V vs. Ag/AgCl)} + 0.222 \text{ V} + 0.059 \text{ pH}$ . In 0.5 M H<sub>2</sub>SO<sub>4</sub>,  $E \text{ (V vs. RHE)} = E \text{ (V vs. Ag/AgCl)} + 0.222 \text{ V}$ . Linear Sweep Voltammetry (LSV) measurements were carried out from -0.6 to 0 V vs. RHE with a scan rate of 5 mV $\cdot$ s<sup>-1</sup> at room temperature and the data is presented with iR compensation. The double layer capacitance ( $C_{dl}$ ) was conducted with cyclic voltammetry (CV) scanning from 0.1 to 0.2 V vs. RHE with different scan rates from 20 to 260 mV $\cdot$ s<sup>-1</sup>. The cycling stability test was performed by CV scanning 1000 cycles from -0.2 to 0.2 V (vs. RHE) with a scan rate of 100 mV $\cdot$ s<sup>-1</sup>. Electrochemical impedance spectroscopy (EIS) experiments were performed with frequencies ranging from 100 kHz to 0.1 Hz with an AC voltage of 5 mV at potential of 200 mV.

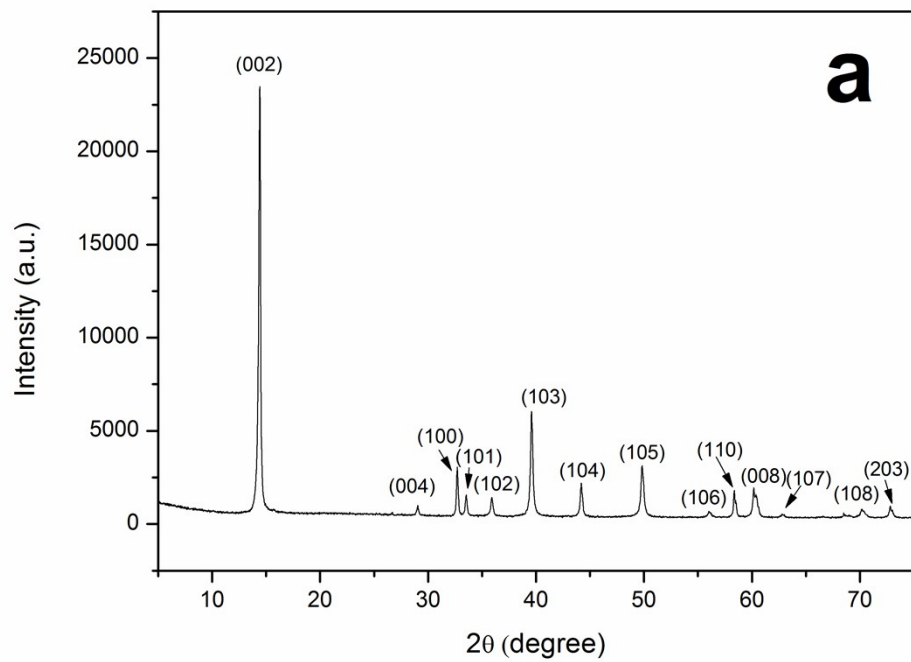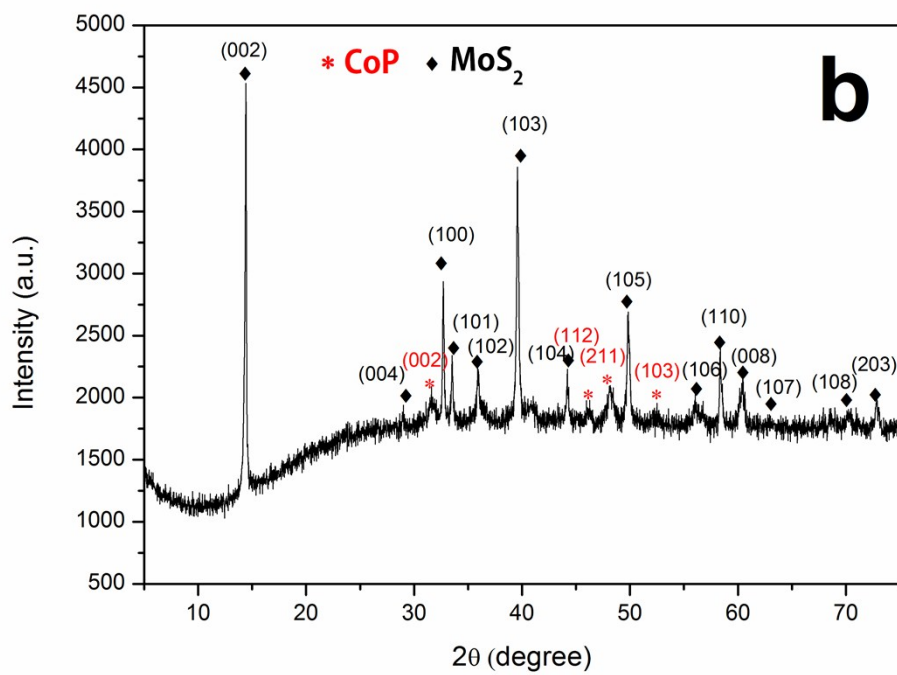

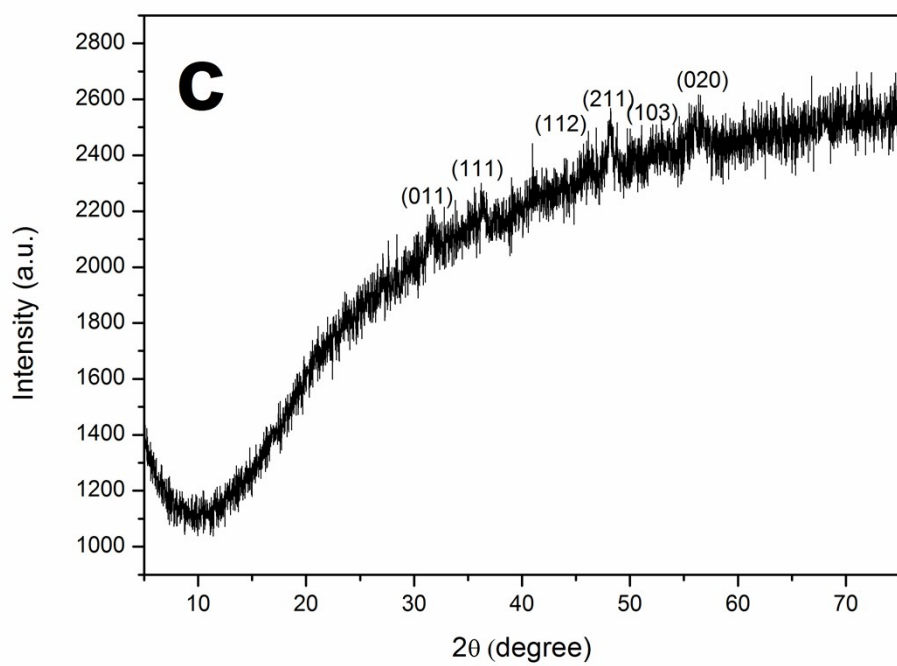

**Fig. S1** XRD patterns of (a) pure MoS<sub>2</sub>, (b) CoP/MoS<sub>2</sub> and (c) pure CoP.

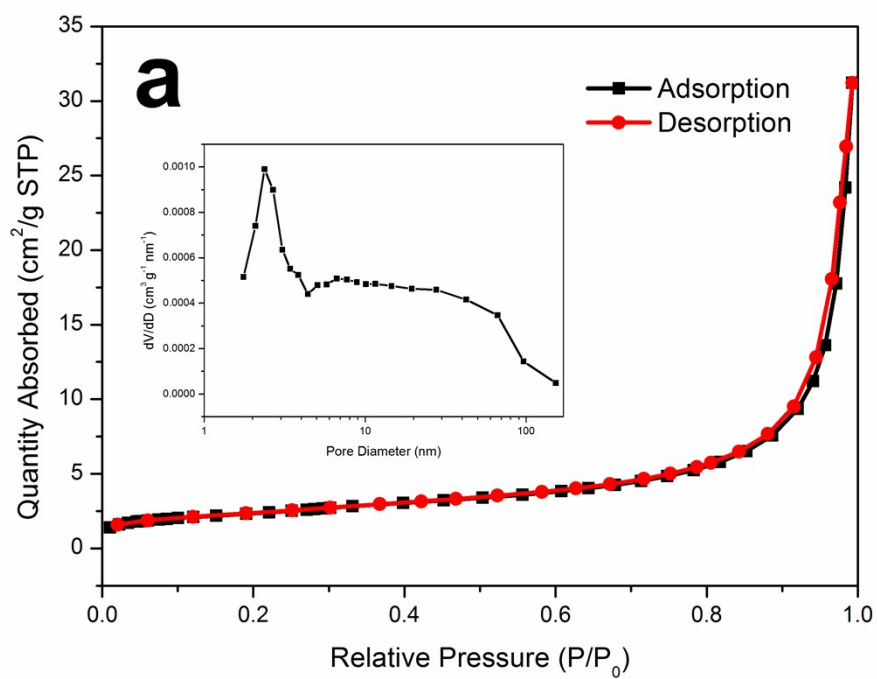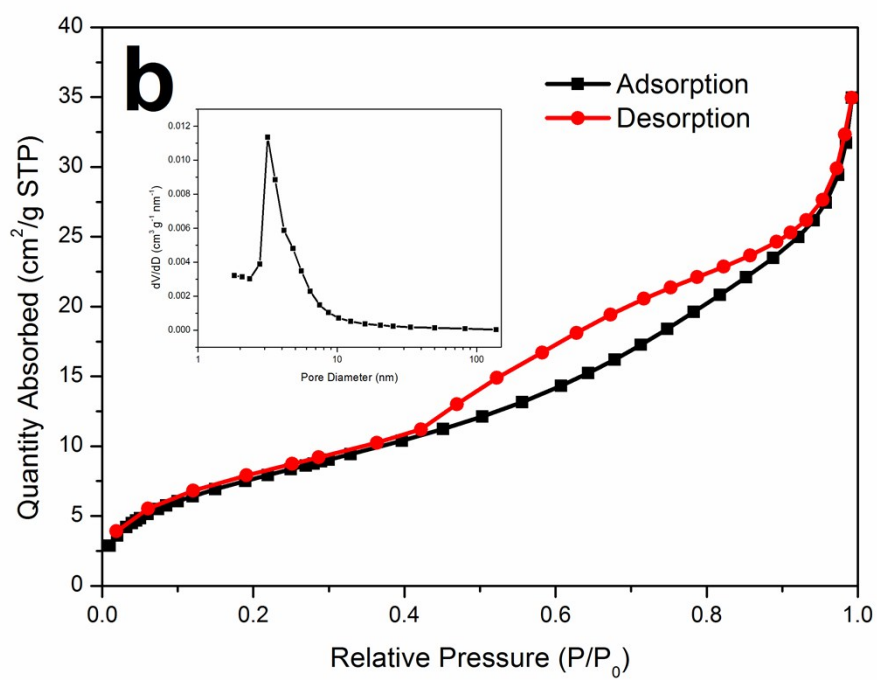

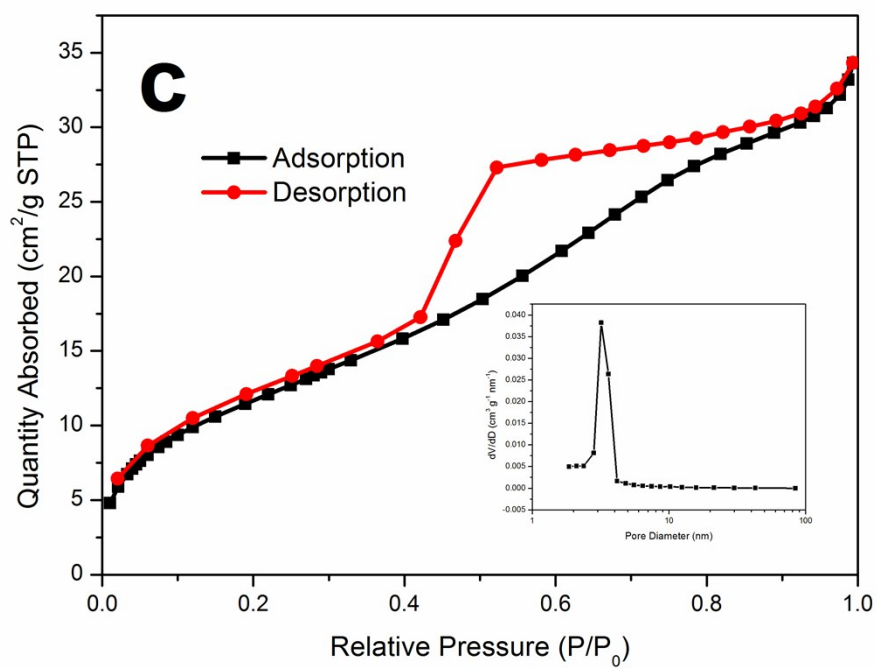

**Fig. S2**  $\text{N}_2$  sorption isotherm of the (a) pure  $\text{MoS}_2$ , (b)  $\text{CoP}/\text{MoS}_2$  catalyst and pure  $\text{CoP}$  (Insets show the corresponding pore-size distribution curve).

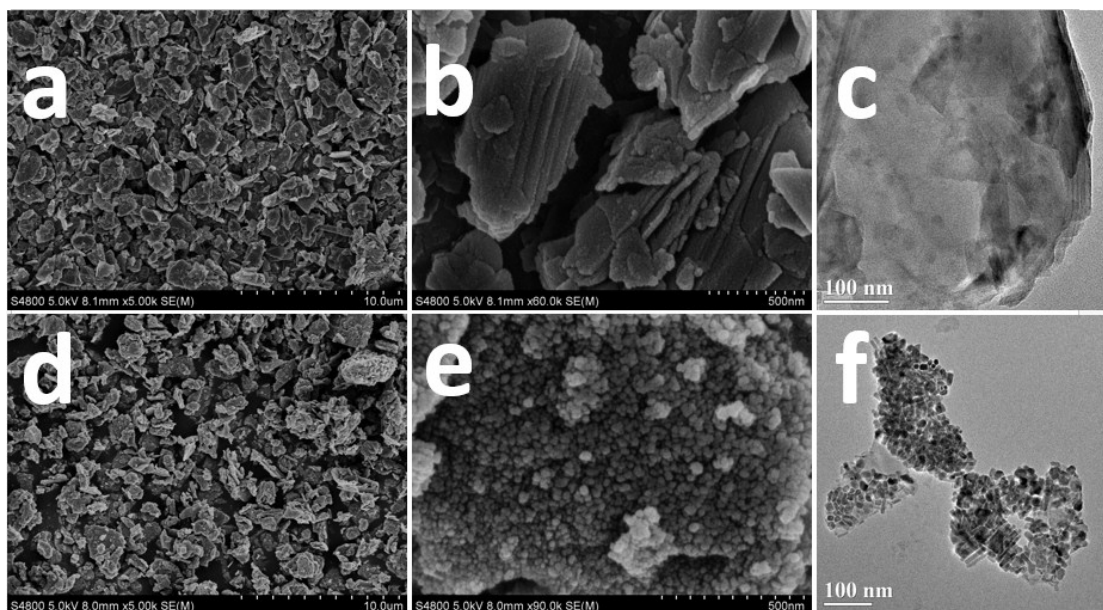

**Fig. S3** SEM and TEM images of (a-c) pure MoS<sub>2</sub> and (d-f) CoP/MoS<sub>2</sub>.

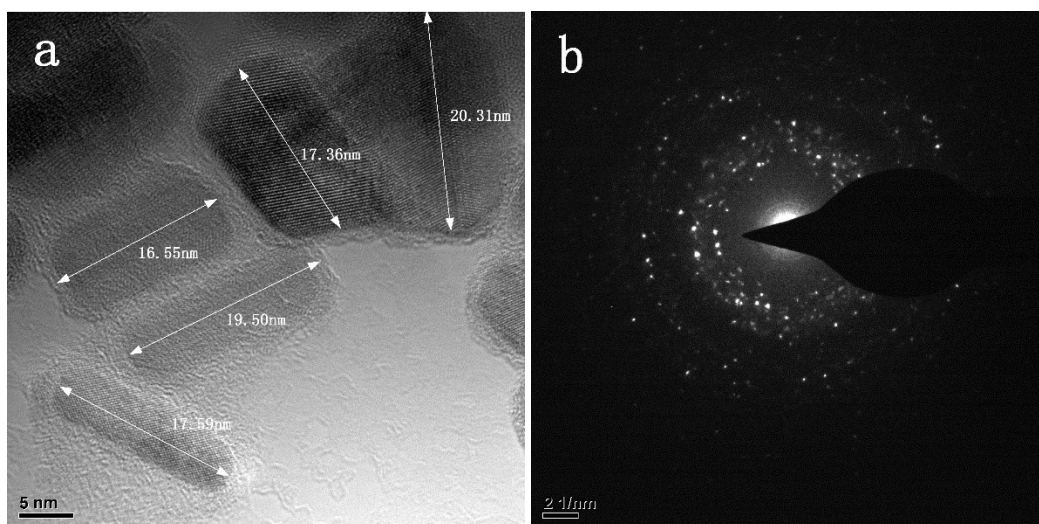

**Fig. S4** (a) TEM and (b) SAED images of pure CoP NRs.

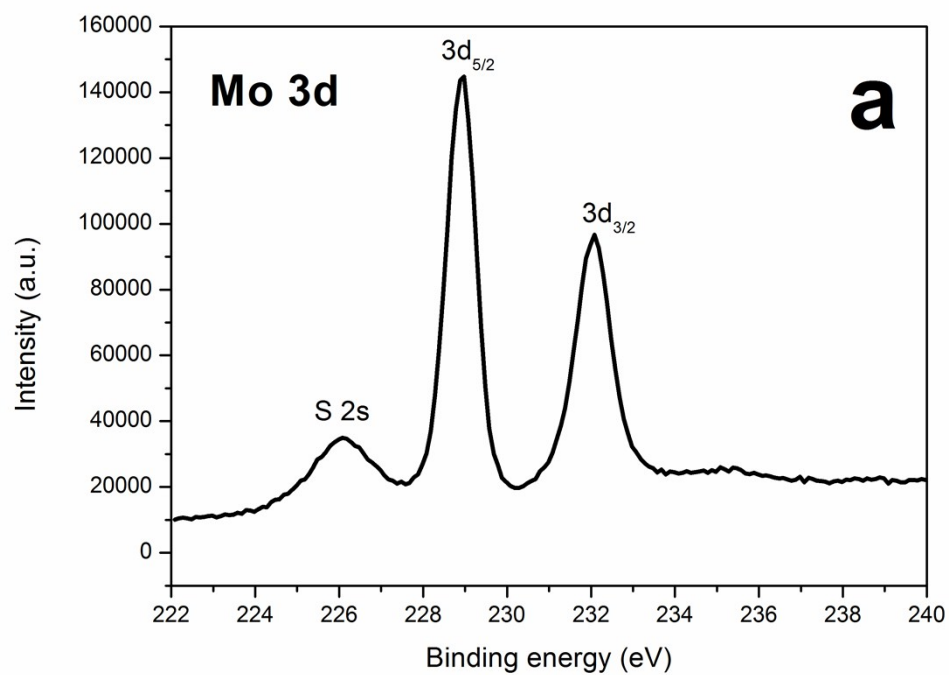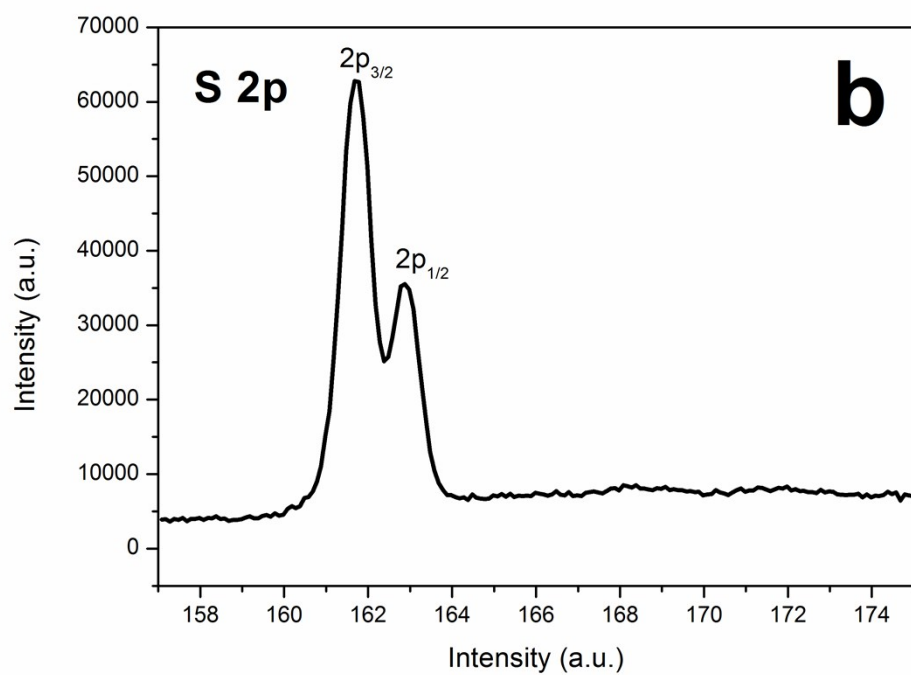

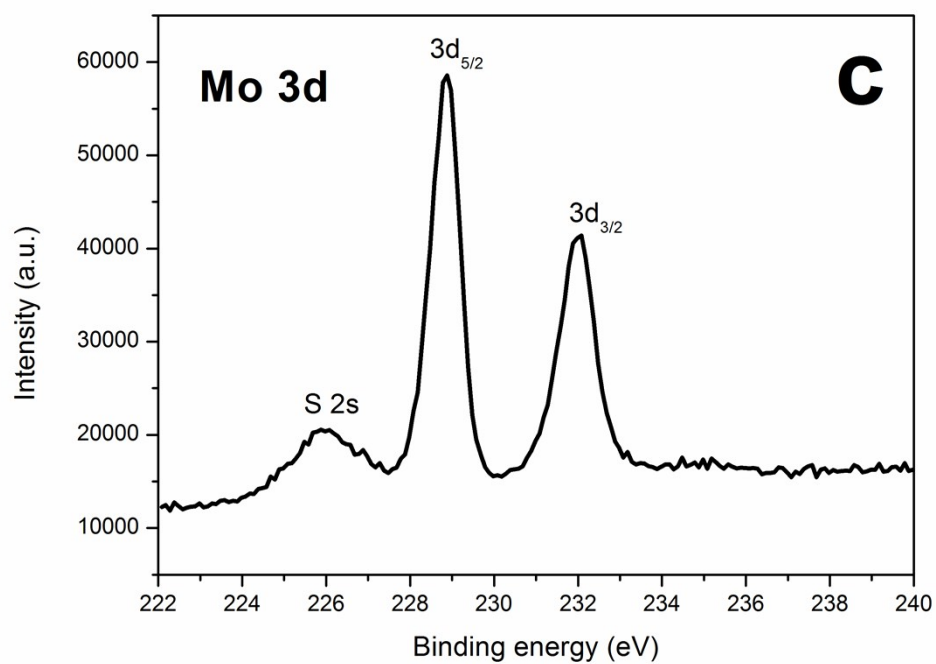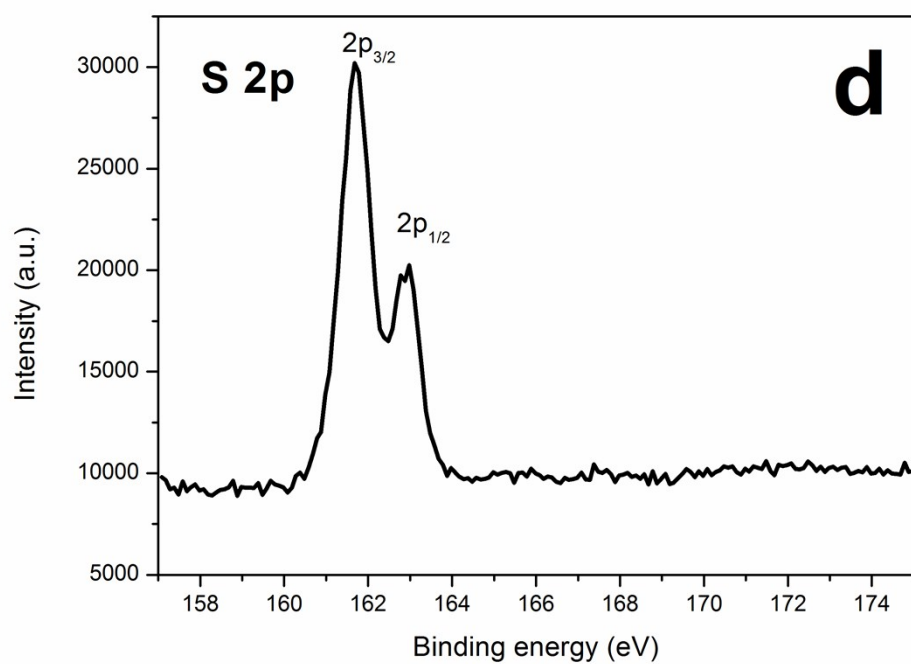

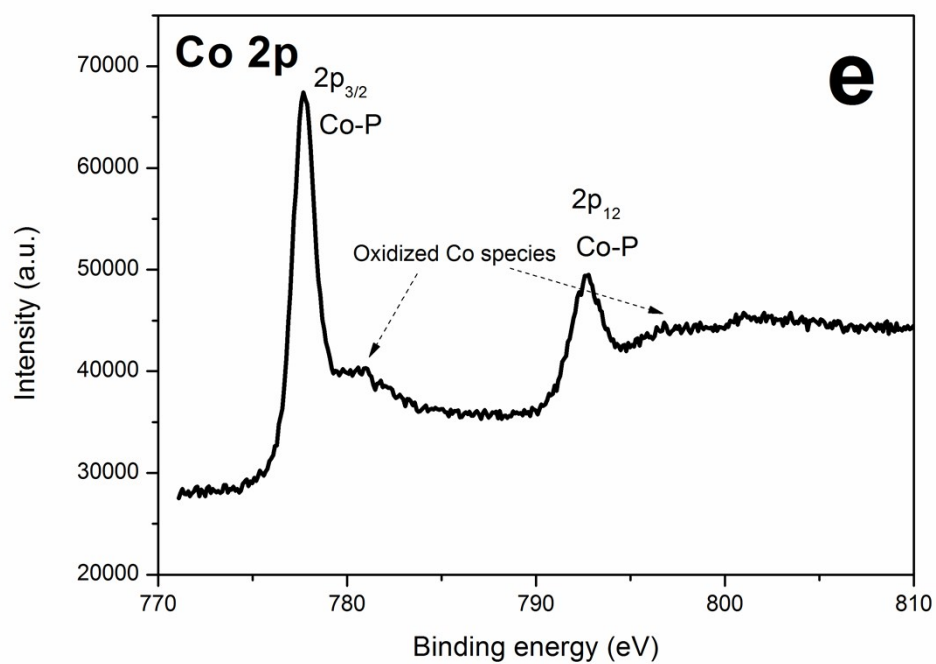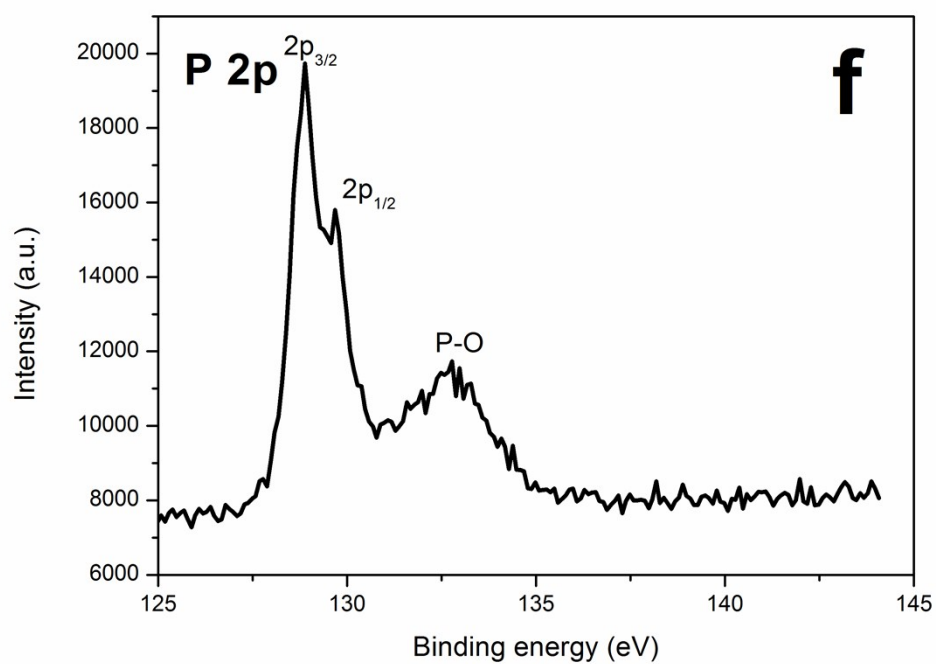

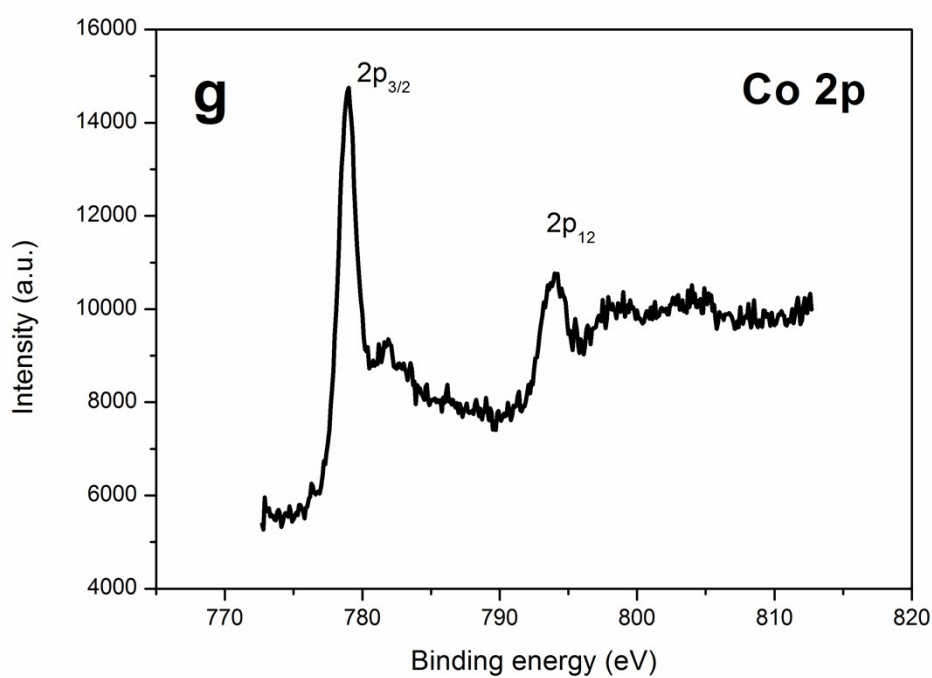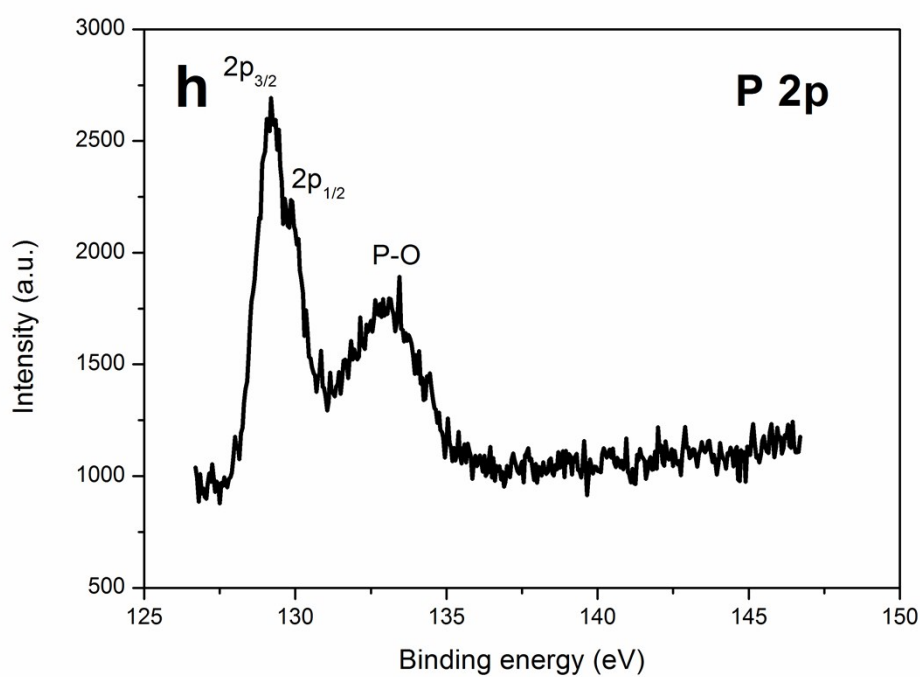

**Fig. S5** XPS spectra of (a) Mo 3d and (b) S 2p regions of the pure MoS<sub>2</sub>. (c) Mo 3d, (d) S 2p, (e) Co 2p and (f) P 2p regions of the as-synthesized CoP/MoS<sub>2</sub> hybrid catalyst. (g) Co 2p and (h) P 2p regions of the pure CoP.

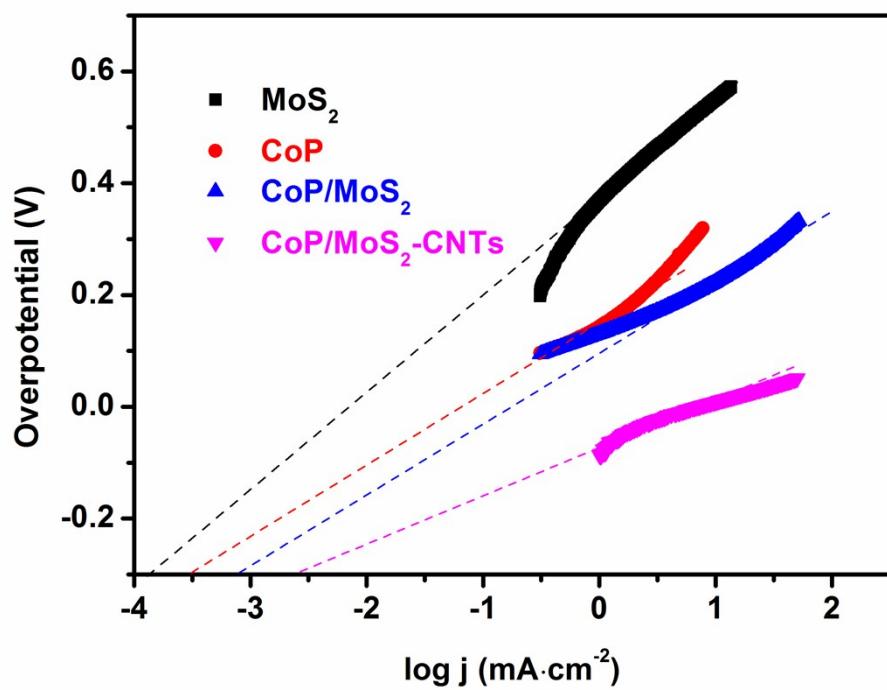

**Fig. S6** Calculation of exchange current density of pure  $\text{MoS}_2$ , pure CoP,  $\text{CoP/MoS}_2$  and  $\text{CoP/MoS}_2\text{-CNTs}$ .

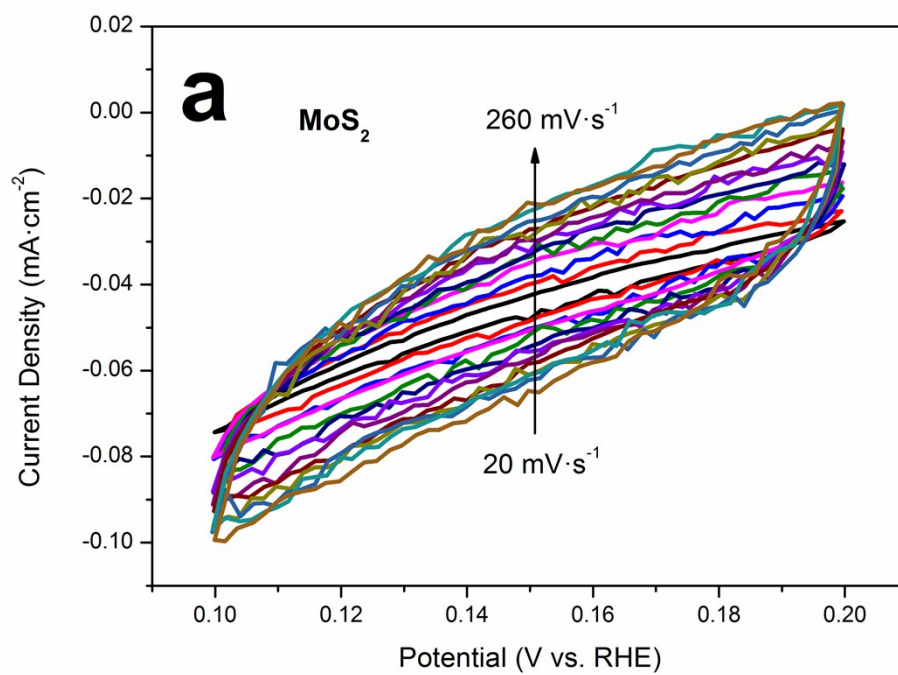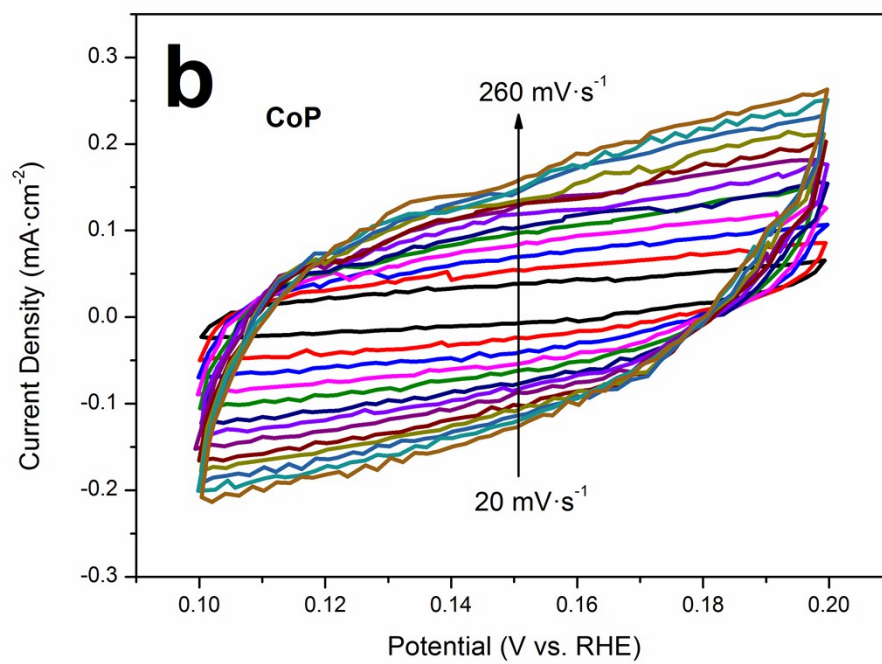

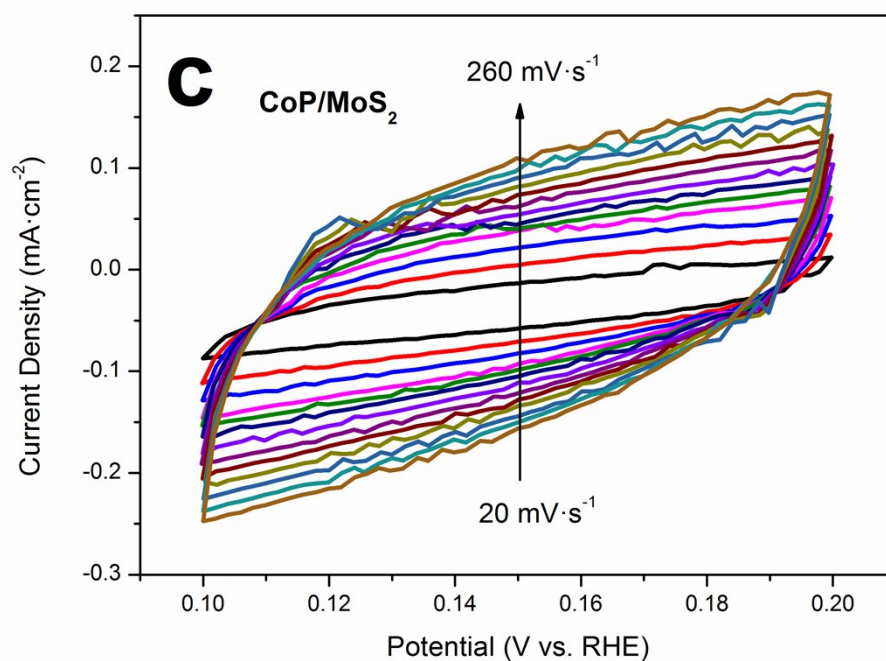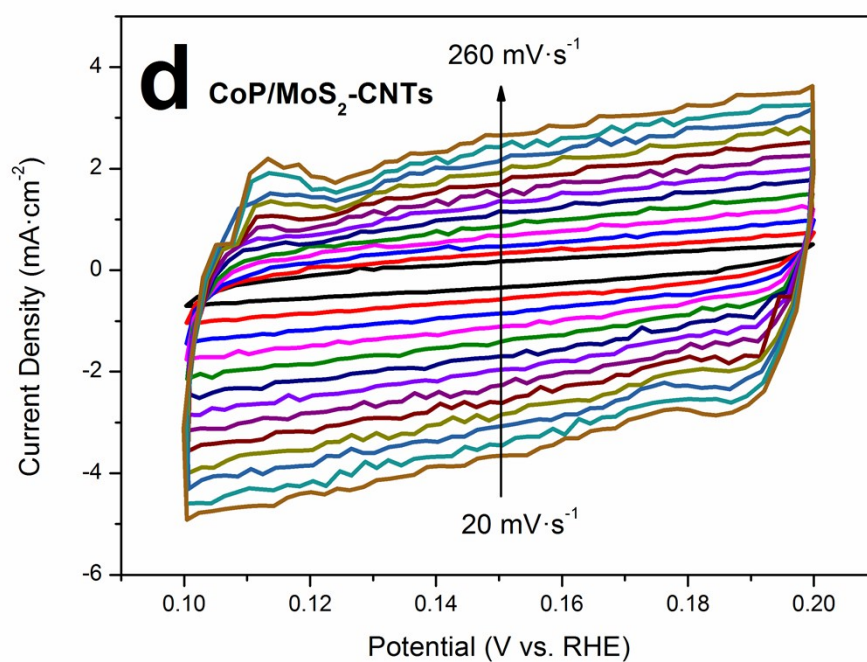

**Fig. S7** CV curves of the pure MoS<sub>2</sub>, pure CoP, CoP/MoS<sub>2</sub> and CoP/MoS<sub>2</sub>-CNTs catalysts in 0.5 M H<sub>2</sub>SO<sub>4</sub> solution in the region of 0.1-0.2 V vs. RHE with different scan rates from 20 mV·s<sup>-1</sup> to 260 mV·s<sup>-1</sup>.

| Catalyst                   | BET surface area<br>(m <sup>2</sup> ·g <sup>-1</sup> ) | Pore volume<br>(cm <sup>3</sup> ·g <sup>-1</sup> ) | Pore size<br>(nm) |
|----------------------------|--------------------------------------------------------|----------------------------------------------------|-------------------|
| MoS <sub>2</sub>           | 8.6                                                    | 0.048                                              | 22.1              |
| CoP                        | 44.2                                                   | 0.047                                              | 3.9               |
| CoP/MoS <sub>2</sub>       | 29.2                                                   | 0.05                                               | 6.25              |
| CoP/MoS <sub>2</sub> -CNTs | 62.6                                                   | 0.47                                               | 26.8              |

**Table S1** Textural properties of the pure MoS<sub>2</sub>, pure CoP, CoP/MoS<sub>2</sub> and CoP/MoS<sub>2</sub>-CNTs catalysts.

**Table S2** Calculations of the exchange current density of the pure MoS<sub>2</sub>, pure CoP, CoP/MoS<sub>2</sub>, and CoP/MoS<sub>2</sub>-CNTs catalyst by using extrapolation methods.

| Catalyst                   | $\log( j  \text{ (mA} \cdot \text{cm}^{-2}))$ at $\eta=0$ V | Exchange current density $j_0$ [ $\mu\text{A} \cdot \text{cm}^{-2}$ ] |
|----------------------------|-------------------------------------------------------------|-----------------------------------------------------------------------|
| MoS <sub>2</sub>           | -3.8                                                        | 0.158                                                                 |
| CoP                        | -3.5                                                        | 0.216                                                                 |
| CoP/MoS <sub>2</sub>       | -3.1                                                        | 0.794                                                                 |
| CoP/MoS <sub>2</sub> -CNTs | -2.5                                                        | 3.16                                                                  |
